# Supplementary material for: Introducing SlideforMap; a probabilistic finite slope approach for modelling shallow landslide probability in forested situations
Source: Copernicus journal article supplement (doi:10.5194/nhess-2021-140), 2021-05-25

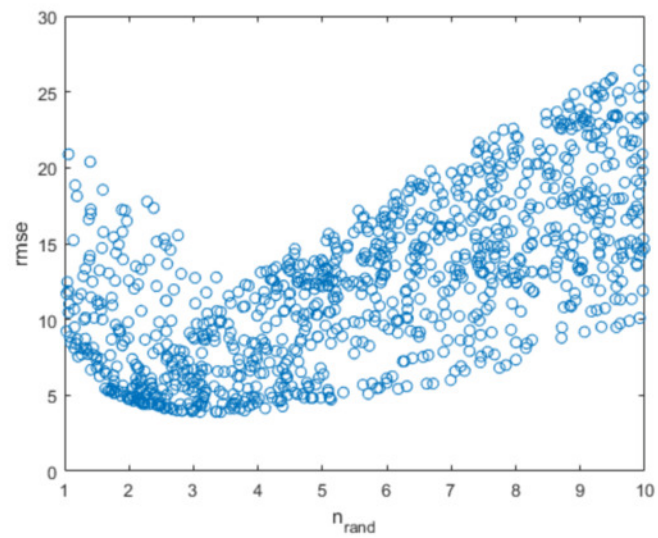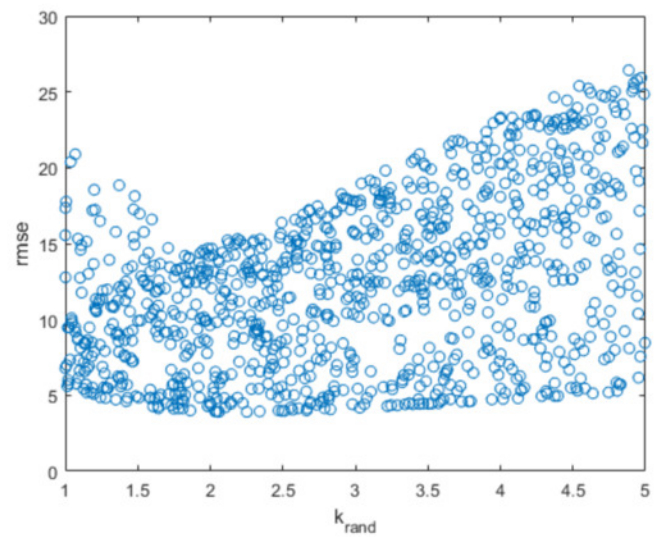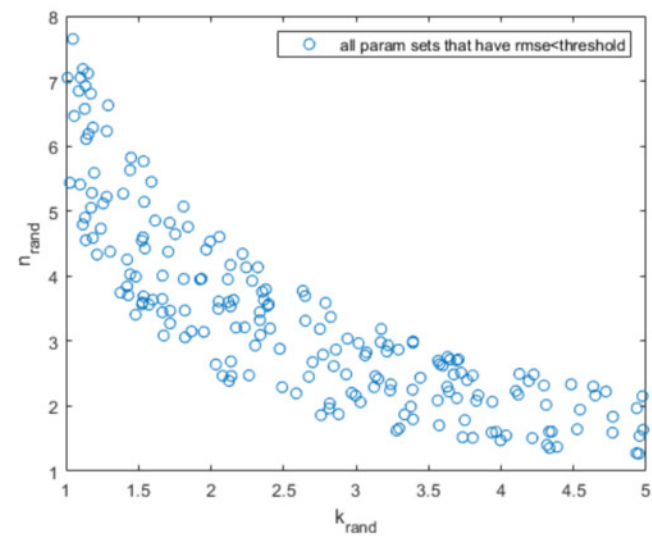

Supplement: Supplementary file [file nhess-2021-140-AC2-supplement.zip]
