# Supplementary material for: Introducing SlideforMap; a probabilistic finite slope approach for modelling shallow landslide probability in forested situations
Source: Copernicus journal article supplement (doi:10.5194/nhess-2021-140), 2021-05-25
Supplement: Supplementary file [file nhess-2021-140-AC2-supplement.zip]

|     | lsd   | rho   | mde   | sdd   | mco   | sco   | mep   | sdp   | Tra   | PPP   | RLa   | Wvg   |
|-----|-------|-------|-------|-------|-------|-------|-------|-------|-------|-------|-------|-------|
| lsd | 1.00  | 0.04  | -0.09 | 0.08  | 0.04  | 0.11  | 0.01  | -0.08 | 0.14  | 0.09  | 0.08  | -0.01 |
| rho | 0.04  | 1.00  | 0.01  | -0.06 | 0.00  | 0.04  | 0.03  | 0.17  | 0.05  | -0.10 | 0.01  | 0.11  |
| mde | -0.09 | 0.01  | 1.00  | -0.01 | 0.45  | -0.02 | 0.08  | 0.09  | 0.03  | -0.01 | 0.24  | -0.10 |
| sdd | 0.08  | -0.06 | -0.01 | 1.00  | 0.12  | 0.04  | 0.04  | 0.04  | -0.04 | 0.05  | 0.06  | 0.00  |
| mco | 0.04  | 0.00  | 0.45  | 0.12  | 1.00  | 0.06  | -0.21 | 0.08  | -0.27 | -0.01 | 0.12  | -0.10 |
| sco | 0.11  | 0.04  | -0.02 | 0.04  | 0.06  | 1.00  | 0.04  | 0.03  | -0.04 | -0.02 | 0.19  | 0.02  |
| mep | 0.01  | 0.03  | 0.08  | 0.04  | -0.21 | 0.04  | 1.00  | 0.00  | 0.03  | 0.05  | 0.03  | 0.03  |
| sdp | -0.08 | 0.17  | 0.09  | 0.04  | 0.08  | 0.03  | 0.00  | 1.00  | -0.08 | 0.06  | 0.14  | -0.14 |
| Tra | 0.14  | 0.05  | 0.03  | -0.04 | -0.27 | -0.04 | 0.03  | -0.08 | 1.00  | 0.08  | -0.16 | 0.11  |
| PPP | 0.09  | -0.10 | -0.01 | 0.05  | -0.01 | -0.02 | 0.05  | 0.06  | 0.08  | 1.00  | 0.06  | -0.01 |
| RLa | 0.08  | 0.01  | 0.24  | 0.06  | 0.12  | 0.19  | 0.03  | 0.14  | -0.16 | 0.06  | 1.00  | -0.02 |
| Wvg | -0.01 | 0.11  | -0.10 | 0.00  | -0.10 | 0.02  | 0.03  | -0.14 | 0.11  | -0.01 | -0.02 | 1.00  |
